# Supplementary material for: Cobalt-doped vanadium nitride composite carbon hollow spheres for enhanced lithium–sulfur battery performance: overcoming sulfur dissolution and the shuttle effect
Source: Royal Society of Chemistry journal article supplement (doi:10.1039/d4se01208a), 2024-11-21
Supplement: d4se01208a1.pdf [file d4se01208a1.pdf]

# Cobalt-Doped Vanadium Nitride Compositing Carbon Hollow Spheres for Enhanced Lithium-Sulfur Battery Performance: Overcoming Sulfur Dissolution and Shuttle Effect

*Jiangnan Zhang<sup>a</sup>, Yanshuang Meng<sup>ab\*</sup>, Fuliang Zhu<sup>ab\*</sup>*

<sup>a</sup> School of Materials Science and Engineering, Lanzhou University of Technology,  
Lanzhou 730050, China

<sup>b</sup> State Key Laboratory of Advanced Processing and Recycling of Non-ferrous Metals,  
Lanzhou 730050, China

\*Corresponding author. E-mail:

chzfl@126.com (Fuliang Zhu)

mengyanshuang@163.com (Yanshuang Meng)

**Table S1** presents performance comparison of different composite as sulfur host materials in lithium-sulfur batteries.

| Cathode materials                                     | Maximum discharge capacity (mAh g <sup>-1</sup> ) | Final capacity (mAh g <sup>-1</sup> ) <sup>1)</sup> | Reference |
|-------------------------------------------------------|---------------------------------------------------|-----------------------------------------------------|-----------|
| CoVN/C-HS@S                                           | 1482 (0.2 C)                                      | 1067 (100 cycles, 0.2 C)                            | This work |
| CoVN/C-HS@S                                           | 951 (2 C)                                         | 662 (400 cycles, 2 C)                               | This work |
| NbP-NbC/C@S                                           | 1367 (0.2 C)                                      | 1216 (250 cycles, 0.2 C)                            | Ref.14    |
| Co-VN/S                                               | 706 (2 C)                                         | 578 (500 cycles, 2 C)                               | Ref. 18   |
| Co-VN/NC/S                                            | 1100 (0.5 C)                                      | 876 (300 cycles, 0.5 C)                             | Ref. 20   |
| Co-VN/NC/S                                            | 810 (2 C)                                         | 490 (100 cycles, 2 C)                               | Ref. 20   |
| Co <sub>3</sub> V <sub>2</sub> O <sub>8</sub> /C-HS@S | 1237 (0.2 C)                                      | 603 (100 cycles, 0.2 C)                             | Ref. 27   |
| V <sub>2</sub> O <sub>3</sub> /C-HS@S                 | 1153(0.05 C)                                      | 433 (300 cycles,0.2 C)                              | Ref. 37   |

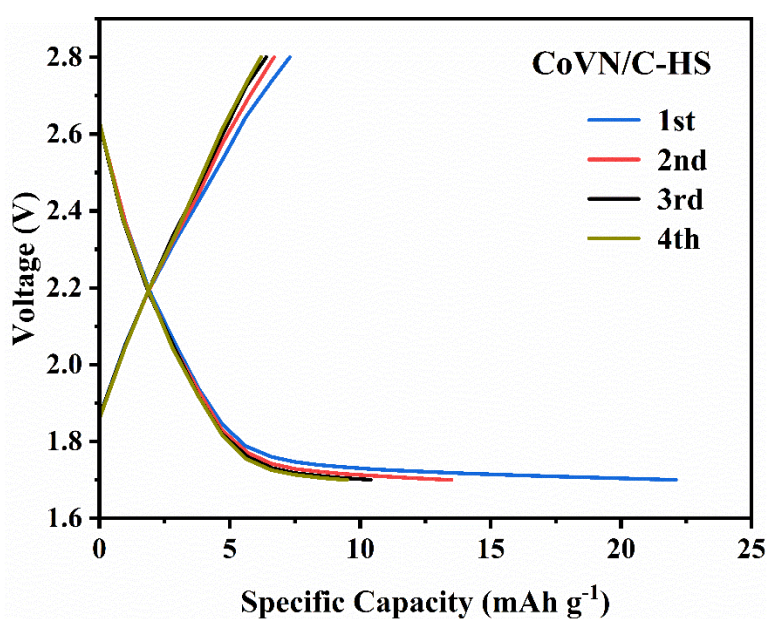

**Figure S1** galvanostatic discharge-charge curves of CoVN/C-HS
